# Supplementary material for: Effect of maternal obesity with and without gestational diabetes on offspring subcutaneous and preperitoneal adipose tissue development from birth up to year-1
Source: PubMed Central journal article supplement (PMC4108007; doi:10.1186/1471-2393-14-138), 2014-04-11
Supplement: 1471-2393-14-138-S1.pdf [file 1471-2393-14-138-S1.pdf]

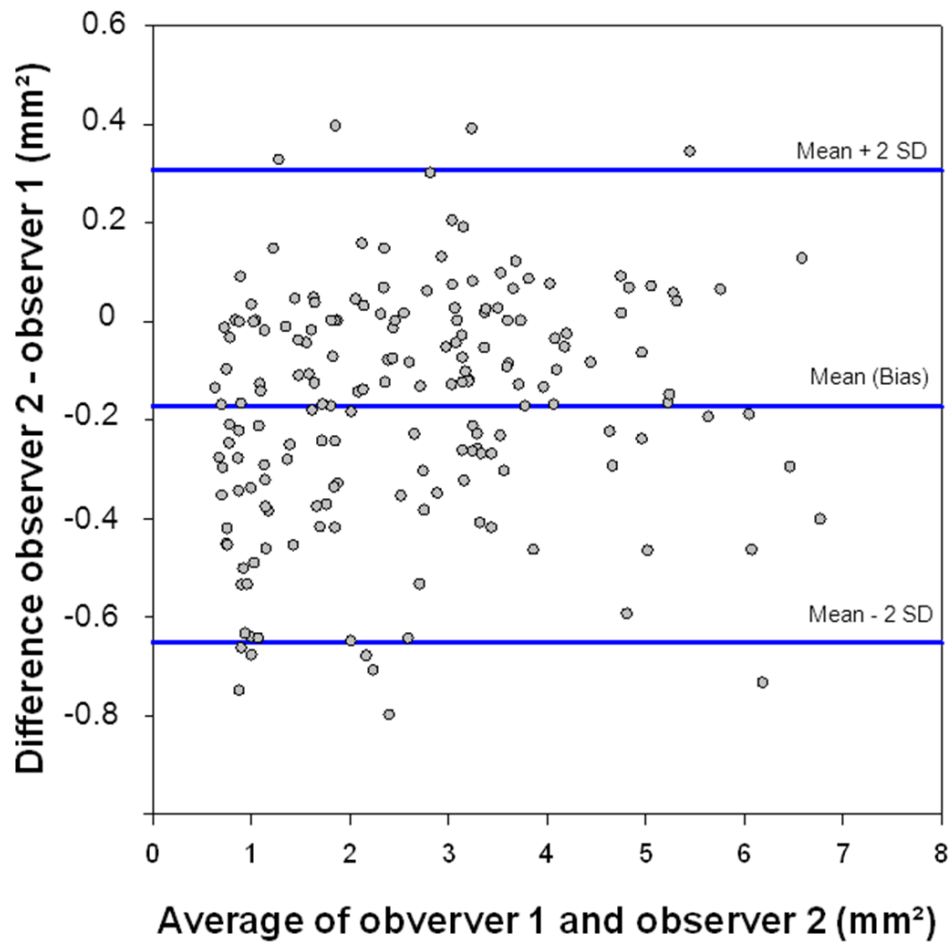

**Figure S1. Inter-observer agreement for the ultrasonographic measurement of preperitoneal and subcutaneous fat assessed by the Bland-Altman plot.** From 120 randomly chosen ultrasonographic images, 180 subcutaneous and preperitoneal adipose tissue areas were independently assessed by a second observer. The mean of the differences (bias) was  $-0.17 \text{ mm}^2$  and the *Limits of Agreement* were  $-0.65 \text{ mm}^2$  (mean - 2 SD) and  $0.31 \text{ mm}^2$  (mean + 2 SD). SD: standard deviation.
