# Supplementary material for: Effect of maternal obesity with and without gestational diabetes on offspring subcutaneous and preperitoneal adipose tissue development from birth up to year-1
Source: PubMed Central journal article supplement (PMC4108007; doi:10.1186/1471-2393-14-138), 2014-04-11
Supplement: 1471-2393-14-138-S2.pdf [file 1471-2393-14-138-S2.pdf]

**Table S1. Regression of infant adipose tissue distribution at all ages on maternal plasma C-peptide and adiponectin levels at 3<sup>rd</sup> trimester**

|                | N  | Maternal C-peptide  |              |                   |              |                           | Maternal HMW adiponectin |              |                   |              |                           | Maternal S <sub>A</sub> |              |                   |              |                           |
|----------------|----|---------------------|--------------|-------------------|--------------|---------------------------|--------------------------|--------------|-------------------|--------------|---------------------------|-------------------------|--------------|-------------------|--------------|---------------------------|
|                |    | Unadjusted analysis |              | Adjusted analysis |              |                           | Unadjusted analysis      |              | Adjusted analysis |              |                           | Unadjusted analysis     |              | Adjusted analysis |              |                           |
|                |    | β                   | P-value      | β                 | P-value      | Adj. model r <sup>2</sup> | β                        | P-value      | β                 | P-value      | Adj. model r <sup>2</sup> | β                       | P-value      | β                 | P-value      | Adj. model r <sup>2</sup> |
| <b>Week-1</b>  |    |                     |              |                   |              |                           |                          |              |                   |              |                           |                         |              |                   |              |                           |
| SFT            | 43 | 0.398               | 0.007        | 0.325             | 0.071        | 0.195; p = 0.026          | -0.278                   | 0.068        | -0.077            | 0.638        | 0.125; p = 0.087          | -0.238                  | 0.120        | 0.031             | 0.860        | 0.121; p = 0.093          |
| SCA            | 36 | <b>0.135</b>        | <b>0.432</b> | <b>0.063</b>      | <b>0.719</b> | <b>0.203; p = 0.046</b>   | <b>-0.040</b>            | <b>0.432</b> | <b>0.047</b>      | <b>0.776</b> | <b>0.201; p = 0.047</b>   | <b>-0.115</b>           | <b>0.502</b> | <b>-0.007</b>     | <b>0.969</b> | <b>0.199; p = 0.049</b>   |
| PPA            | 36 | <b>0.539</b>        | <b>0.001</b> | <b>0.533</b>      | <b>0.001</b> | <b>0.430; p= 0.001</b>    | <b>-0.481</b>            | <b>0.003</b> | <b>-0.338</b>     | <b>0.038</b> | <b>0.288; p = 0.012</b>   | <b>-0.479</b>           | <b>0.003</b> | <b>-0.280</b>     | <b>0.115</b> | <b>0.241; p = 0.026</b>   |
| <b>Week-6</b>  |    |                     |              |                   |              |                           |                          |              |                   |              |                           |                         |              |                   |              |                           |
| SFT            | 40 | 0.116               | 0.489        | 0.256             | 0.163        | 0.137; p = 0.110          | -0.039                   | 0.812        | 0.126             | 0.498        | 0.075; p = 0.220          | -0.157                  | 0.340        | 0.056             | 0.283        | 0.064; p = 0.248          |
| SCA            | 40 | 0.073               | 0.660        | 0.117             | 0.515        | 0.146; p = 0.098          | -0.005                   | 0.977        | 0.146             | 0.417        | 0.140; p = 0.101          | -0.101                  | 0.537        | 0.105             | 0.587        | 0.130; p = 0.115          |
| PPA            | 40 | 0.055               | 0.739        | -0.009            | 0.960        | 0.179; p = 0.063          | -0.325                   | 0.041        | -0.244            | 0.147        | 0.260; p = 0.017          | -0.326                  | 0.040        | -0.181            | 0.323        | 0.233; p = 0.026          |
| <b>Month-4</b> |    |                     |              |                   |              |                           |                          |              |                   |              |                           |                         |              |                   |              |                           |
| SFT            | 39 | 0.009               | 0.958        | 0.054             | 0.785        | 0.118; p = 0.145          | 0.105                    | 0.525        | 0.131             | 0.479        | 0.067; p = 0.246          | 0.054                   | 0.742        | 0.202             | 0.295        | 0.085; p = 0.203          |
| SCA            | 39 | -0.080              | 0.633        | -0.008            | 0.967        | 0.050; p = 0.295          | 0.282                    | 0.081        | 0.387             | 0.041        | 0.088; p = 0.196          | 0.239                   | 0.143        | 0.475             | 0.015        | 0.138; p = 0.109          |
| PPA            | 39 | 0.095               | 0.565        | 0.267             | 0.212        | -0.046; p = 0.622         | 0.014                    | 0.930        | 0.077             | 0.694        | -0.085; p = 0.780         | 0.105                   | 0.518        | 0.148             | 0.426        | 0.123; p = 0.718          |
| <b>Year-1</b>  |    |                     |              |                   |              |                           |                          |              |                   |              |                           |                         |              |                   |              |                           |
| SFT            | 41 | -0.047              | 0.774        | -0.220            | 0.288        | -0.026; p = 0.548         | 0.169                    | 0.290        | 0.226             | 0.234        | -0.034; p = 0.583         | 0.102                   | 0.526        | 0.208             | 0.304        | -0.045; p = 0.631         |
| SCA            | 41 | 0.152               | 0.348        | 0.003             | 0.989        | -0.007; p = 0.476         | -0.026                   | 0.872        | 0.109             | 0.562        | -0.029; p = 0.564         | -0.090                  | 0.575        | 0.119             | 0.552        | -0.029; p = 0.561         |
| PPA            | 41 | 0.225               | 0.162        | 0.202             | 0.275        | 0.177; p = 0.061          | -0.224                   | 0.159        | -0.105            | 0.539        | 0.147; p = 0.087          | 0.084                   | 0.603        | -0.137            | 0.416        | 0.154; p = 0.079          |

Adj: adjusted; β: standardized regression coefficient; PPA: preperitoneal adipose tissue; r<sup>2</sup>: coefficient of determination; S<sub>A</sub>: HMW-total adiponectin ratio; SCA: subcutaneous adipose tissue; SFT: sum of the 4 skinfold thickness measurements (biceps + triceps + subscapular + suprailiac). Variables for adjusted analysis: infant sex, pregnancy duration, respective breastfeeding status, maternal pre-pregnancy BMI, AUC<sub>Glucose</sub> (OGTT) and gestational weight gain. Values indicated in bold are presented in Figure 1.
