# Supplementary material for: Effect of maternal obesity with and without gestational diabetes on offspring subcutaneous and preperitoneal adipose tissue development from birth up to year-1
Source: PubMed Central journal article supplement (PMC4108007; doi:10.1186/1471-2393-14-138), 2014-04-11
Supplement: 1471-2393-14-138-S3.pdf [file 1471-2393-14-138-S3.pdf]

**Table S2. Spearman and partial correlations of cord plasma adiponectin with cord plasma insulin and newborn adipose tissue parameters**

|                     | N  | Cord plasma HMW adiponectin |         |                |         | Cord plasma total adiponectin |         |                |         | Cord plasma S <sub>A</sub> |         |                |         |
|---------------------|----|-----------------------------|---------|----------------|---------|-------------------------------|---------|----------------|---------|----------------------------|---------|----------------|---------|
|                     |    | r <sub>1</sub>              | P-value | r <sub>2</sub> | P-value | r <sub>1</sub>                | P-value | r <sub>2</sub> | P-value | r <sub>1</sub>             | P-value | r <sub>2</sub> | P-value |
| Cord plasma insulin | 44 | 0.119                       | 0.442   | 0.064          | 0.699   | 0.121                         | 0.432   | 0.010          | 0.951   | 0.159                      | 0.304   | 0.150          | 0.362   |
| Weight              | 44 | -0.101                      | 0.515   | -0.047         | 0.775   | -0.086                        | 0.580   | -0.032         | 0.846   | -0.146                     | 0.345   | -0.232         | 0.156   |
| Ponderal index      | 44 | -0.150                      | 0.332   | -0.134         | 0.416   | -0.143                        | 0.355   | -0.129         | 0.433   | -0.143                     | 0.348   | -0.274         | 0.092   |
| SFT                 | 44 | 0.011                       | 0.941   | 0.007          | 0.964   | 0.016                         | 0.918   | 0.008          | 0.964   | -0.093                     | 0.546   | -0.059         | 0.721   |
| SCA                 | 36 | 0.197                       | 0.250   | 0.173          | 0.354   | 0.218                         | 0.201   | 0.194          | 0.295   | -0.028                     | 0.873   | -0.048         | 0.798   |
| PPA                 | 36 | 0.140                       | 0.416   | 0.211          | 0.234   | 0.129                         | 0.454   | 0.237          | 0.200   | -0.038                     | 0.827   | 0.126          | 0.500   |

PPA: preperitoneal adipose tissue; r<sub>1</sub>: Spearman correlation coefficient; r<sub>2</sub>: partial correlation coefficient adjusted for infant sex, pregnancy duration, maternal pre-pregnancy BMI, AUC<sub>Glucose</sub> (OGTT) and gestational weight gain; S<sub>A</sub>: HMW-total adiponectin ratio; SCA: subcutaneous adipose tissue; SFT: sum of the 4 skinfold thickness measurements (biceps + triceps + subscapular + suprailiac).
